# Supplementary material for: Moringa oleifera Leaf Extract-Mediated Green Synthesis of Nanostructured Alkaline Earth Oxide (MgO) and Its Physicochemical Properties
Source: Hindawi journal article supplement (doi:10.1155/2021/4301504), 2021-06-23
Supplement: f1 [file 4301504.f1.doc]

**Supplementary Information**

**Moringa Oleifera leaf extract mediated green Synthesis of nano structured Alkaline earth oxide (MgO) and its physico chemical properties**

**V. Archana1*, J. Joseph Prince1, S.kalainathan2**

1Department of Physics, University College of Engineering,Anna University (BIT campus),

Tiruchirappalli, Tamil Nadu, India

2Centre for Crystal Growth, VIT, Vellore, Tamil Nadu, India

**Correspondence author mail:venkatachalamarchana@yahoo.com**

**3.7. Complex spectroscopy and impedance analysis**

3.7.2. Real part of impedance (Z’)

3.7.3. Imaginary part of impedance (z”)

**Fig.S1 Real part and imaginary part of impedance (z’ and z”) at 500 °C (a, b), 600 °C(c, d), 700 °C (e, f)**

**3.7.4. Cole-Cole plot or Nyquist plot**

**Fig. S2 Nyquist plot of 500 °C, 600 °C, 700 °C (a, b, c)**

**3.7.5. Complex electric modulus Analysis**

**3.7.5. 1.Real and Imaginary part of electric modulus**

**Fig. S3 Real part of electric modulus at 500 °C , 600 °C, 700 °C (a,b,c)**

**Fig. S4 Imaginary part of electric modulus of *MgO* at 500 °C , 600 °C, 700 °C (d, e ,f)**

**Fig. S5 M’ vs M” of MgO at 500 °C, 600 °C, 700 °C (g, h, i)**

**
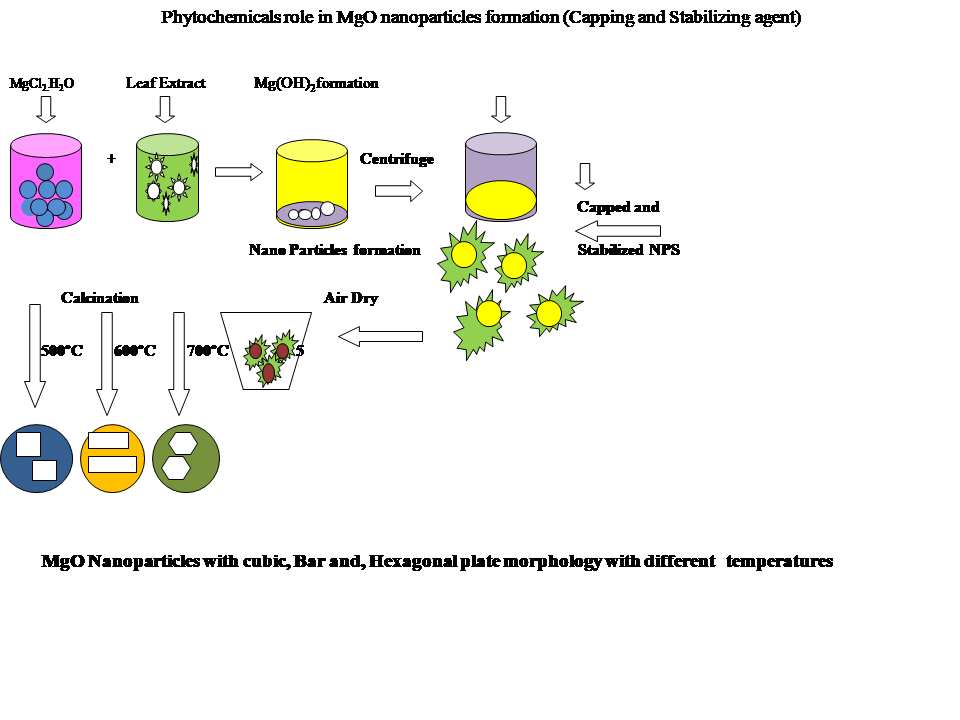
Fig S6 Graphical Abstract**
